1 Title: Evaluating species distribution models with discrimination accuracy is  
2 uninformative for many applications

3

4 Running title: Evaluating niche models with occurrences

5

6 Authors: Dan L. Warren<sup>1,2,3\*</sup>, Nicholas J. Matzke<sup>4</sup>, and Teresa L. Iglesias<sup>3,5</sup>

7

8 \* To whom correspondence should be addressed: dan.l.warren@gmail.com

9 1. Senckenberg Biodiversity and Climate Research Centre, Frankfurt, Germany

10 2. Biodiversity and Biocomplexity Unit, Okinawa Institute of Science and

11 Technology, Okinawa, Japan

12 3. Department of Biology, Macquarie University, Sydney, Australia

13 4. Department of Biological Sciences, University of Auckland, Auckland, New

14 Zealand

15 5. Physics and Biology Unity, Okinawa Institute of Science and Technology

16

17

18

19 Author Contributions: All authors contributed to study design and manuscript

20 preparation. Simulations were coded and run by DLW, literature review was

21 performed by TLI. Post hoc analyses were performed by TLI and DLW.

## 22 **Abstract**

### 23 *Aim*

24 Species distribution models are used across evolution, ecology, conservation,  
25 and epidemiology to make critical decisions and study biological phenomena,  
26 often in cases where experimental approaches are intractable. Choices regarding  
27 optimal models, methods, and data are typically made based on discrimination  
28 accuracy: a model's ability to predict subsets of species occurrence data that  
29 were withheld during model construction. However, empirical applications of  
30 these models often involve making biological inferences based on continuous  
31 estimates of relative habitat suitability as a function of environmental predictor  
32 variables. We term the reliability of these biological inferences "functional  
33 accuracy." We explore the link between discrimination accuracy and functional  
34 accuracy.

35

### 36 *Methods*

37 Using a simulation approach we investigate whether models that make good  
38 predictions of species distributions correctly infer the underlying relationship  
39 between environmental predictors and the suitability of habitat.

40

### 41 *Results*

42 We demonstrate that discrimination accuracy is only informative when models  
43 are simple and similar in structure to the true niche, or when data partitioning is  
44 geographically structured. However, the utility of discrimination accuracy for  
45 selecting models with high functional accuracy was low in all cases.

46

47 *Main conclusions*

48 These results suggest that many empirical studies and decisions are based on  
49 criteria that are unrelated to models' usefulness for their intended purpose. We  
50 argue that empirical modeling studies need to place significantly more emphasis  
51 on biological insight into the plausibility of models, and that the current  
52 approach of maximizing discrimination accuracy at the expense of other  
53 considerations is detrimental to both the empirical and methodological  
54 literature in this active field. Finally, we argue that future development of the  
55 field must include an increased emphasis on simulation; methodological studies  
56 based on ability to predict withheld occurrence data may be largely  
57 uninformative about best practices for applications where interpretation of  
58 models relies on estimating ecological processes, and will unduly penalize more  
59 biologically informative modeling approaches.

60

61 Species distribution models (SDM, alternatively environmental niche  
62 models or ENM) use data on species occurrences in conjunction with  
63 environmental data to generate statistical models of species' ecological  
64 tolerances, environmental limits, and potential to occupy different geographic  
65 areas. These methods have been used since the 1920s ([Cook 1925](#), [Sutherst  
66 2014](#)), but recent years have seen rapid growth in the number of studies  
67 employing SDM in fields including ecology, conservation biology, evolutionary  
68 biology, and epidemiology ([Peterson, Soberón et al. 2011](#), [Coro, Pagano et al.  
69 2013](#), [Allen and Lendemer 2016](#), [Gutierrez-Tapia and Palma 2016](#), [Lezama  
70 Ochoa, Murua et al. 2016](#), [Raghavan, Goodin et al. 2016](#), [Guisan, Thuiller et al.  
71 2017](#)). The primary appeal of SDMs is their tractability; estimating  
72 environmental tolerances experimentally is expensive and time-consuming at  
73 best, and impractical for many species. In contrast, SDMs can be constructed  
74 with minimal investment of resources, using freely available data and software  
75 ([Hijmans, Cameron et al. 2005](#), [Phillips, Anderson et al. 2006](#), [Thuiller,  
76 Lafourcade et al. 2009](#), [Hijmans, Phillips et al. 2012](#), [Kriticos, Webber et al. 2012](#)).  
77 For many species of conservation concern, they are one of the only tractable  
78 means of estimating habitat suitability, often in cases where stakeholders need  
79 these estimates urgently ([Keith, Mahony et al. 2014](#), [Warren, Wright et al. 2014](#)).

80 SDM construction involves many decisions which may affect model  
81 predictions. These include choice of modeling algorithm, required sample size,  
82 optimal model complexity, choice of study area from which data are drawn, the  
83 exclusion of outliers, and selection of environmental predictors, among others  
84 ([Guisan, Graham et al. 2007](#), [Wisz, Hijmans et al. 2008](#), [Acevedo, Jimenez-](#)

85 [Valverde et al. 2012](#), [Domisch, Kuemmerlen et al. 2013](#), [Boria, Olson et al. 2014](#),  
86 [Varela, Anderson et al. 2014](#), [Garcia-Callejas and Araujo 2016](#), [Soley-Guardia](#),  
87 [Gutierrez et al. 2016](#), [van Proosdij, Sosef et al. 2016](#)). The literature surrounding  
88 these decisions is large and growing rapidly, as is the suite of associated software  
89 tools. Decisions about how best to model species are typically made using  
90 metrics that test discrimination accuracy on subsets of species occurrence data  
91 that have been withheld during model construction ([Elith, Graham et al. 2006](#),  
92 [Radosavljevic and Anderson 2014](#)). However, the binary prediction of withheld  
93 occurrence data is rarely the intended application of SDMs; they are more  
94 frequently used to make continuous estimates of habitat suitability, and to make  
95 predictions outside of the training conditions both in space and in time. These  
96 applications often implicitly assume that there is biological meaning to the  
97 continuous suitability scores produced by the model, or to the functional  
98 relationship between environmental gradients and habitat suitability. However,  
99 it is often not clear which (if any) measurable biological phenomena should be  
100 correlated with suitability estimates from SDMs. Many of the measurable  
101 phenomena that are potentially related to suitability (e.g., population density  
102 ([Carrascal, Aragon et al. 2015](#)), upper limit of local abundance ([VanDerWal, Shoo](#)  
103 [et al. 2009](#), [Gomes, IJff et al. 2018](#))) have not been quantified in detail for many  
104 real species and as such are unavailable for model validation.

105         This impracticality of studying environmental suitability experimentally  
106 makes it difficult to measure the ability of SDMs to correctly make continuous  
107 estimates of habitat suitability. As such, modeling decisions are typically  
108 predicated on an assumed relationship between a model's ability to make  
109 continuous estimates of relative habitat suitability (hereafter referred to as

110 “functional accuracy”) and its ability to predict withheld occurrence data  
111 (discrimination accuracy). This assumption has been questioned before ([Lobo,](#)  
112 [Jimenez-Valverde et al. 2008](#)), but its importance and validity for SDM studies is  
113 largely untested.

114 Discrimination accuracy is known to be a potentially misleading measure  
115 for many applications; it is known to be a poor indicator of model calibration  
116 ([Reineking and Schröder 2006](#), [Jimenez-Valverde, Acevedo et al. 2013](#)), and may  
117 even be negatively correlated with calibration and functional accuracy under  
118 some conditions ([Murphy and Winkler 1992](#)). This general statistical problem  
119 may be exacerbated by attributes of the SDM process in a number of ways. First,  
120 spatial autocorrelation present in species distributions and in the environment  
121 can generate spurious correlations that a model might treat as biological truth,  
122 resulting in models that produce high discrimination accuracy even when  
123 occurrence data is random ([Raes and ter Steege 2007](#)) or the predictors are  
124 biologically meaningless ([Bahn and McGill 2007](#), [Bahn and McGill 2013](#),  
125 [Fourcade, Besnard et al. 2018](#)). Second, there are phenomena other than the  
126 suitability of habitat that shape species distributions (e.g., historical  
127 biogeography, dispersal, biotic interactions, Figure 1) ([Soberon and Peterson](#)  
128 [2005](#), [Kearney 2006](#), [Anderson 2012](#), [Warren 2012](#), [Warren 2013](#), [Warren,](#)  
129 [Cardillo et al. 2014](#)). Although it is possible to include these processes as  
130 predictors for SDMs, this is not often done in practice. Failure to explicitly  
131 consider these processes introduces spurious correlations between species  
132 occurrences and the environment into the estimate of the environmental niche.

133 Similarly, the collection of occurrence data often shows spatial biases  
134 (Figure 1, panel F), which may be correlated with spatially autocorrelated

135 predictors ([Phillips, Dudik et al. 2009](#)). All of these phenomena can lead to poor  
136 niche estimates (Figure 2) that still have high discrimination accuracy in  
137 geographic space. Since these non-target phenomena are shared between  
138 training and test data, a model that parameterizes the environmental correlates  
139 of these processes may have higher discrimination accuracy than a model that  
140 accurately estimates the species' environmental tolerances, and yet may produce  
141 pathological behavior in applications where model transferability or continuous  
142 estimates of habitat suitability are desired ([Lobo, Jimenez-Valverde et al. 2008](#),  
143 [Veloz 2009](#), [Radosavljevic and Anderson 2014](#), [Torres, Sutton et al. 2015](#), [Huang](#)  
144 [and Frimpong 2016](#)).

145         A further issue with discrimination accuracy is the lack of true absence  
146 data. One of the primary reasons that SDM methods are so tractable is that they  
147 can be used without true absence data, which is often difficult and expensive to  
148 obtain. SDMs deal with the lack of true absences by sampling "pseudoabsence"  
149 or "background" points which are ideally intended to represent the set of  
150 environmental conditions that are potentially accessible to the species. This  
151 requires users to make decisions about the size of the appropriate study area for  
152 background samples ([Acevedo, Jimenez-Valverde et al. 2012](#)), as well as the  
153 nature of sampling (e.g., random points or points from closely related species  
154 ([Phillips, Dudik et al. 2009](#))). These decisions are often somewhat arbitrary (e.g.,  
155 background areas chosen using political boundaries or poorly-justified  
156 assumptions about dispersal), and can affect both the inferred model ([Acevedo,](#)  
157 [Jimenez-Valverde et al. 2012](#)) and the performance of metrics used to evaluate  
158 models ([Acevedo, Jimenez-Valverde et al. 2012](#), [Hijmans 2012](#), [Jimenez-Valverde,](#)  
159 [Acevedo et al. 2013](#)). The lack of real absence data results in models that are

160 incapable of accurately predicting prevalence, and that incorrectly treat some  
161 suitable conditions as unsuitable.

162         Finally, the usefulness of discrimination accuracy as a criterion for  
163 selecting SDMs may also be negatively impacted by model complexity.  
164 Discrimination accuracy only measures whether a model assigns higher  
165 suitability values to presence points than it does to background or absence  
166 points, and highly flexible algorithms may produce a broad range of marginal  
167 suitability functions that have similar, or even identical, discrimination accuracy  
168 (Figure 3). This phenomenon is likely compounded by the frequent use of large  
169 numbers of predictors that are highly collinear; as the number of predictors and  
170 the complexity of marginal suitability functions increase, the number of potential  
171 models with similar discrimination accuracy grows very rapidly.

172         Although many of these problems with discrimination accuracy have been  
173 noted before, the utility of discrimination metrics for SDM studies has not been  
174 examined in a system where the true niche and habitat suitability are known. As  
175 a result, we have little information on how useful these metrics are for empirical  
176 studies where the goal is to estimate the relative suitability of habitat, despite  
177 the ubiquity of discrimination metrics in SDM model selection.

178         Here we adopt a simulation approach to explore the relationship between  
179 discrimination and functional accuracy using virtual species for which the true  
180 niche is known. We build models using a number of different algorithms, study  
181 area sizes, and methods of partitioning training and test data. However, these  
182 simulations are not intended to represent all possible modeling approaches. The  
183 goal of these simulations is not to determine which method produces the best  
184 niche or distribution estimates, but rather to evaluate commonly used methods



185 for model selection across a broad range of models in a system where we know  
186 the underlying true habitat suitability.

187

188 **Methods**To examine how model selection was affected by modeling  
189 algorithm, sampling bias, and non-target spatial phenomena, we conducted four  
190 sets of simulation experiments:

- 191 1. High complexity: Artificial niches were generated using three  
192 randomly chosen variables and models were constructed using all  
193 nineteen bioclimatic variables. Background data were drawn from  
194 100 km circular buffers around occurrence points.
- 195 2. Geographic partitioning: Same conditions as (1) but presence and  
196 background points for each species were split into four quadrants  
197 using ENMEval ([Muscarella, Galante et al. 2014](#)). Presence and  
198 background data from one randomly selected quadrant were withheld  
199 for model evaluation.
- 200 3. Large background: Same conditions as (1), but background data were  
201 drawn from 1000 km circular buffers around occurrence points.
- 202 4. Low complexity: Niches were based on two randomly chosen  
203 variables and models were built using those two variables plus two  
204 more chosen at random.

205

206 All analyses used CliMond data for 19 bioclimatic variables typically  
207 employed in SDM studies ([Nix 1986](#)) [ENREF 1](#), including data for the present  
208 and for 24 combinations of future emissions scenario (A1B and A2), year (2030,  
209 2050, 2070, 2080, 2090, and 2100), and climate model (CSIRO-Mk3.0 and

210 MIROC-H) ([Kriticos, Webber et al. 2012](#)). Simulations and analyses were  
211 restricted to Australia, including Tasmania.

212 Simulated niches were created using the generateRandomSp function in  
213 the virtualspecies R package ([Leroy, Meynard et al. 2015](#)). Simulated species  
214 with fewer than 400 suitable grid cells in the initial presence/absence raster  
215 showed a strong tendency to produce models that showed no suitable habitat on  
216 future climate scenarios, rendering comparisons that were uninformative for  
217 model selection. As a result, these simulations were discarded.

218 To simulate the effects of non-target spatial processes (e.g., historical  
219 biogeography, biotic interactions, dispersal limitation), the initial  
220 presence/absence raster from virtualspecies was converted to point data, which  
221 was partitioned into allopatric regions using k-means clustering. Solutions  
222 ranging from 2 to 10 clusters were considered, and an algorithm was used to  
223 maximize the minimum distance between clusters. One region was assigned at  
224 random to be the range of the species, and converted back into a raster. We  
225 recorded the total proportion of suitable cells that fell within this range, to  
226 measure the extent to which species distributions departed from the distribution  
227 of available suitable habitat across the entire study area.

228 Spatial sampling bias was modeled using data from 5,969,252 collection  
229 records for 28,286 Australian plant species. These records were harvested from  
230 GBIF ([GBIF.org 2015](#)) using the rgbif ([Chamberlain, Boettiger et al. 2013](#))  
231 package, and converted to a raster representing the number of observations per  
232 grid cell at the same extent and resolution as the environmental data. All values  
233 were then divided by the maximum cell value, resulting in a range of sampling  
234 intensity from 0 to 1.

235 Species occurrence data was sampled from a raster with values in each  
236 grid cell  $x$  calculated as:

237

$$238 \quad p(x) = (1 - g_b)s(x)r(x) + g_b b(x)s(x)r(x)$$

239

240 Where probability of sampling is a function of  $p(x)$ ,  $g_b$  is a parameter that  
241 controls the magnitude of spatial sampling bias,  $b(x)$  is the relative strength of  
242 spatial sampling bias in cell  $x$ ,  $s(x)$  is the suitability of habitat in the grid cell, and  
243  $r(x)$  is a binary variable taking the value 1 inside the species range and 0  
244 everywhere else. For each species, we drew 100 simulated occurrence points by  
245 selecting grid cells at random and sampling occurrences as a Bernoulli trial with  
246 probability of success equal to  $p(x)$ . Presence points were drawn with  
247 replacement so that we could study the effects of sampling bias. We simulated  
248 data across eleven levels of spatial sampling bias, with the bias strength  
249 parameter ranging from 0 to 1 in increments of 0.1. We performed 20  
250 simulations for each of the 11 levels of spatial sampling bias. Each of the four  
251 simulation conditions (experiments 1-4, above) therefore consisted of 220  
252 simulations, for a total of 880 total simulated species across all experiments.

253 As noted in a recent review ([Meynard, Leroy et al. 2019](#)), simulation  
254 studies need to choose both the simulated niches and sampling regimes that are  
255 appropriate for the question involved. Since our goal here is to test which  
256 metrics select models that accurately estimate the niche, it was essential for us to  
257 generate data that would be capable of producing accurate niche estimates in  
258 ideal conditions. Due to these concerns we chose not to apply a threshold  
259 minimum suitability score below which the organism could not possibly occur;

260 the application of such a threshold would truncate the response functions we are  
261 trying to estimate ([Meynard, Leroy et al. 2019](#)), resulting in lower expected  
262 functional accuracy. Additionally, prior work with virtual species has  
263 demonstrated that the application of thresholds results in discrimination  
264 accuracy metrics that are overly optimistic ([Meynard and Kaplan 2013](#)).

265 We built models using seven algorithms; Bioclim, Domain, generalized  
266 linear models (GLM), generalized additive models (GAM), Maxent, random  
267 forests, and boosted regression trees. Models were built using the dismo R  
268 package ([Hijmans, Phillips et al. 2012](#)) and Maxent ([Phillips, Anderson et al.  
269 2006](#)). This resulted in 6160 inferred models, seven for each of the 880  
270 simulated niches. Algorithm settings were left at their default values. For each  
271 model, 25 occurrence points were withheld from model construction and used  
272 for model evaluation. Each model's discrimination accuracy was evaluated  
273 using three statistics: the area under the receiver operating characteristic curve  
274 (AUC) ([Fielding and Bell 1997](#)), the true skill statistic (TSS) ([Allouche, Tsoar et al.  
275 2006](#)), and Cohen's kappa ([Cohen 1960](#)). While AUC can be calculated using  
276 continuous suitability scores, TSS and kappa require binary predictions of  
277 presence and absence, so the values for these models that were used in model  
278 assessment corresponded to their maximum value across all potential  
279 thresholds, i.e., the best possible performance of a thresholded model ([Fielding  
280 and Bell 1997](#)).

281 Models were projected onto the current distribution of the environmental  
282 variables used for model construction. Models were also projected onto the 24  
283 future climate scenarios. We used the simulated niche from the virtualspecies  
284 object to project the true suitability of habitat across those same set of future

285 environments, to assess whether discrimination accuracy is a useful predictor of  
286 models' ability to extrapolate to new environmental conditions. To measure  
287 functional accuracy, we compared geographic projections of habitat suitability  
288 from the true niche and the inferred models using Spearman rank correlation.  
289 Correlations between projected and true suitability scores for the present and  
290 for future climate scenarios were measured separately within the species range  
291 (areas where  $r(x) = 1$ ) and across the entire study area (Australia and Tasmania).  
292 Spearman rank correlation was chosen as a measure of functional accuracy for  
293 this study due to the structural differences between models produced by  
294 different algorithms, and in consideration of how SDMs are often applied; any  
295 two models that assign identical rankings to a set of habitat patches are  
296 effectively interchangeable for applications where models are thresholded, or  
297 where suitability scores are used to prioritize one habitat patch over another.  
298 Rank correlation will reflect this when models produce similar rankings of  
299 relative habitat suitability (e.g.,  $\rho = 1$  when predictions made from one model are  
300 a monotonically increasing function of predictions made from another model).  
301 In contrast, Pearson product moment correlation will only assign a value of 1 if  
302 the relationship between suitability scores for the two models is linear, which  
303 may serve to exaggerate differences that are not relevant to many empirical  
304 studies. In order to test the sensitivity of our results to this choice, we also  
305 conducted a separate set of analyses using Pearson product moment correlation  
306 as a measure of functional accuracy (Appendix S4), but results from these  
307 analyses were effectively the same as those seen in tables 1 and 2.

308 We choose to focus on functional accuracy here instead of calibration for  
309 several reasons; first, the application of SDMs more often relies on the relative

310 suitability of habitat than estimating the exact probability of observing a species  
311 in a particular place, and functional accuracy more directly estimates this aspect  
312 of model behavior. Second, it is already known that discrimination accuracy may  
313 be poorly correlated to calibration even when the model gets the relative  
314 ranking of habitat right. For example, if the estimated suitability of habitat is a  
315 transformation of the true suitability of habitat that preserves relative rankings  
316 but not the magnitude of differences in suitability scores ([Reineking and](#)  
317 [Schröder 2006](#)), both discrimination and functional accuracy would be high, but  
318 calibration would be poor. Finally, the link between discrimination accuracy and  
319 calibration is known to be severely affected by prevalence ([Reineking and](#)  
320 [Schröder 2006](#), [Elith and Graham 2009](#)), but the link between discrimination  
321 accuracy and functional accuracy as measured here would not be so affected.

322 To summarise the relationships between discrimination and functional  
323 accuracy for all algorithms considered together (Table 1 and Appendix S3 and  
324 S4), we used generalized linear mixed models, and evaluated correlations using  
325 McFadden's pseudo- $r^2$  ([McFadden 1974](#)). For the remainder of the regressions,  
326 we used linear models and the standard coefficient of determination,  $r^2$ . We  
327 applied Bonferroni corrections to compensate for problems arising from  
328 multiple testing. For these purposes we defined four families of test that we  
329 consider independently. Those examining the relationship between  
330 discrimination and functional accuracy at each combination of algorithm and  
331 complexity level (Tables 1 and 2,  $n = 12$  comparisons per set), and the  
332 remainder, which are intended primarily to examine which factors impact  
333 overall model quality and as a check to establish that expected relationships  
334 between metrics are seen in the simulation results (Appendix S3,  $n = 11$ ).

335           Based on results from experiments 1-4, we performed a fifth set of  
336 simulation experiments to examine more thoroughly the effects of niche  
337 complexity and the number of predictor variables on the relationship between  
338 discrimination and functional accuracy (Figure 4). Due to the computational  
339 intensity of some SDM algorithms, we restricted analyses to a simpler set of  
340 conditions for these simulations. Presence data was generated with no non-  
341 target spatial biological processes and no spatial sampling bias, so occurrence  
342 points were sampled across the entirety of the suitable habitat. We restricted the  
343 modeling process to GLM and Maxent, and only used AUC for evaluating  
344 predictions on randomly withheld test data. Simulated niches were built using a  
345 number of environmental variables ranging between 1 and 19, and models were  
346 inferred with between 1 and 19 variables (2 to 19 for Maxent, due to issues with  
347 the software implementation), subject to the constraint that variables that were  
348 included within the species' niche were selected first during model construction.  
349 For each combination of number of niche axes and environmental predictors, we  
350 performed 300 separate simulations, resulting in 108,300 total simulations per  
351 modeling method. For each simulation we recorded the test AUC and the rank  
352 correlation between the inferred and true suitability of habitat. For each  
353 combination of number of niche axes and predictors, we then measured the rank  
354 correlation between discrimination accuracy and functional accuracy across the  
355 set of 300 models. This resulted in a metric ranging from 1, where test AUC was  
356 a perfect indicator of functional accuracy, to -1, where test AUC was negatively  
357 associated with functional accuracy. We fit a linear model to these results which  
358 included the number of variables used for the simulated niche, the number of  
359 variables used for model construction, and an interaction term.

360

## 361 **Results**

362           Regression outputs for experiments 1-4 are summarized in tables 1  
363 (algorithms pooled) and 2 (algorithms analyzed separately), and also in  
364 appendices S3, S4, and S5. TSS, kappa, and AUC were all highly correlated with  
365 each other, so we will not discuss them separately. We found that discrimination  
366 accuracy on training and test data were correlated, and that functional accuracy  
367 in the training region was correlated with functional accuracy outside the  
368 training region. This indicates that models that perform well at discrimination  
369 accuracy tend to do so regardless of whether it is measured on training or test  
370 data, and the same is true of models that perform well at functional accuracy.  
371 Functional accuracy was generally fairly good; a majority of models produced  
372 estimates of habitat suitability that were positively correlated with the true  
373 suitability of habitat, whether measured in the training region (73.8%), or  
374 projected to the continental scale (80.8%). However, models performed  
375 somewhat worse when projected into future climate scenarios (65.7% were  
376 positively correlated with true suitability within the species range, 71.0% at the  
377 continental scale).

378           When all algorithms were analyzed together in a single GLM,  
379 discrimination accuracy was a very poor predictor of functional accuracy in all  
380 cases (Table 1). Although 31/48 regressions were statistically significant, five  
381 were negative correlations, and none had an  $r^2$  value greater than 0.2. This  
382 indicates poor performance of discrimination accuracy at selecting models when  
383 comparing between algorithms.



384 Results of regressions conducted for each algorithm separately are  
385 presented in Table 2. For all experiments, we find that discrimination accuracy is  
386 uninformative or actively misleading about models' functional accuracy in a  
387 majority of cases (significant positive correlations were seen for less than half of  
388 comparisons in any simulation experiment). A majority of these correlations  
389 were also quite weak; the average  $r^2$  value was 0.08 (range -.15 to .26). This  
390 indicates poor performance of discrimination accuracy at selecting models with  
391 high functional accuracy even when comparing models that were built using the  
392 same methods. Discrimination accuracy had no negative correlations with  
393 functional accuracy when test data were chosen based on a geographic partition  
394 of the species' range, but was still a poor predictor of functional accuracy  
395 (average  $r^2 = 0.12$ ).

396 We note an interesting phenomenon here with respect to the size of the  
397 buffer regions used to draw background data for model fitting and evaluation;  
398 the models built using the largest (1000 km) buffers around occurrence points  
399 performed very well, with the highest levels of functional accuracy and  
400 discrimination accuracy (Appendix S5). These differences were most prominent  
401 for discrimination accuracy, reinforcing previous findings showing that  
402 discrimination accuracy is sensitive to study area ([Lobo, Jimenez-Valverde et al.  
403 2008](#)). Some previous studies have suggested the models perform best when  
404 constructed using fairly small study regions, however those studies have largely  
405 assessed model quality via discrimination accuracy within the species' native  
406 range ([Acevedo, Jimenez-Valverde et al. 2012](#), [Zhu, Rédei et al. 2014](#)). These  
407 results indicate that the relationship between study area size and model

408 performance may be more complex than previously reported, and optimal  
409 choices may depend on the applications for which models are designed.

410 Our fifth experiment examined the effects of complexity across a broader  
411 range of complexity values, and found that the ability of AUC to select GLM  
412 models with high functional accuracy was negatively correlated with the  
413 complexity of the simulated niche and the number of predictor variables. For  
414 Maxent models the relationship between discrimination accuracy and functional  
415 accuracy (Figure 4) was positively but weakly correlated ( $r^2 = .09$ ) with the  
416 number of variables in the true niche, but uncorrelated with the number of  
417 variables included in the modeling process.

418

## 419 **Discussion**

420 SDM methods are used for many applications in which niche estimates  
421 are needed but experimental approaches are impractical. Results for  
422 experiments 1-4 demonstrate that many of these models can provide useful  
423 estimates of the relative suitability of habitat, the ability of species to invade new  
424 areas, and the effects of climate change. However, one of the key steps in any  
425 modeling study is the identification of which models from a candidate set  
426 perform well and which perform poorly. Our results indicate that the most  
427 widely used methods for selecting models are largely uninformative for studies  
428 where the goal is to make continuous estimates of habitat suitability, or to  
429 estimate the species' response to an environmental gradient. When algorithms  
430 were analyzed separately, 15/149 statistically significant correlations between  
431 discrimination and functional accuracy were negative. In these cases  
432 discrimination metrics were not just uninformative, but in fact positively

433 misleading for applications where the goal of SDM is to predict the relative  
434 suitability of habitat.

435         In our fifth experiment we examined the effects of niche and model  
436 complexity for GLM models across a broader set of conditions, and found that  
437 discrimination accuracy predicts functional accuracy only when both the niche  
438 and the environmental space it is being modeled in are far simpler than those  
439 seen typically in the empirical literature (Figure 4). Even at low levels of  
440 complexity, the relationship between discrimination and functional accuracy for  
441 GLM is fairly weak (Spearman rank correlation = 0.31 for a single niche axis and  
442 predictor variable), and declines rapidly as models become more complex,  
443 becoming minimally informative as models approach levels of complexity that  
444 are often seen in the empirical literature.

445         For Maxent models the number of predictors used to model the niche had  
446 no effect on the utility of discrimination accuracy for model selection, but there  
447 was a weak positive effect of the number of variables used to simulate the true  
448 niche ( $\beta = .006$ ,  $p < .05$ ). We hypothesize that the lack of effect of the number of  
449 predictors for Maxent is due to its ability to automatically penalize  
450 overparameterization; many of the predictors supplied to the algorithm may  
451 ultimately have little or no weight in the model. We also note that the most  
452 reliable correlations between discrimination accuracy and functional accuracy  
453 seen in our simulation results were for Maxent models (Table 2), as would be  
454 expected if model complexity and number of predictors were partly responsible  
455 for driving the poor performance of discrimination accuracy.

456         Discrimination accuracy was generally a better predictor of functional  
457 accuracy for GLM, GAM, and Maxent models than for the other methods of model

458 construction explored in this study. This is likely due to the internal structure of  
459 these models. The simulation approach taken here uses a logistic function to  
460 generate sampling probabilities based on a simulated niche, which is composed  
461 of smooth (linear or quadratic) responses to a set of environmental variables.  
462 As such, the function underlying habitat suitability lies within the set of functions  
463 that may be exactly estimated by GLM, GAM, or Maxent, so that estimation of  
464 simulated niches is considerably more tractable for those methods. We  
465 therefore caution users to refrain from interpreting these results as an  
466 endorsement of any particular method when constructing SDMs using empirical  
467 data. Rather, we suggest that these results indicate that choice of modeling  
468 methods should ideally include intuition or data regarding the potential  
469 functional relationship between the environmental predictors and the suitability  
470 of habitat. If the functional relationships that may be estimated by an algorithm  
471 differ significantly from the true functional relationship, discrimination accuracy  
472 is largely uninformative or misleading about models' ability to predict habitat  
473 suitability. This does not necessarily imply that models built using different  
474 functional shapes from the true niche are poor estimates of habitat suitability;  
475 rather it indicates that discrimination accuracy is uninformative for selecting  
476 models with high functional accuracy under these conditions.

477         Our results clearly indicate that most empirical studies using SDM  
478 methods should ideally not rely solely on prediction of withheld occurrence data  
479 to assess model quality. However, they also indicate a much more systemic  
480 problem for the SDM literature: decades of methodological work in this field  
481 have resulted in a set of widely-adopted "best practices", but a great majority of  
482 these studies have focused on optimizing models' discrimination accuracy on

483 withheld occurrence data from real species distributions ([Guisan, Graham et al.](#)  
484 [2007](#), [Wisn, Hijmans et al. 2008](#), [Domisch, Kueimmerlen et al. 2013](#), [Boria, Olson](#)  
485 [et al. 2014](#), [Radosavljevic and Anderson 2014](#), [Moreno-Amat, Mateo et al. 2015](#),  
486 [Garcia-Callejas and Araujo 2016](#), [Huang and Frimpong 2016](#), [Kuebler,](#)  
487 [Hildebrandt et al. 2016](#), [Lopatin, Dolos et al. 2016](#), [Rovzar, Gillespie et al. 2016](#),  
488 [Soley-Guardia, Gutierrez et al. 2016](#)). Given the disconnect seen here between  
489 discrimination and functional accuracy, it is entirely possible that the “best  
490 practices” advocated in these studies have negligible, or even detrimental, effects  
491 on model quality for applications where functional accuracy is the goal.

492         In order to accurately assess the ability of different methods to achieve  
493 useful levels of functional accuracy, we argue that the methodological literature  
494 must reevaluate its “best practices” via simulations where true habitat suitability  
495 and niche parameters are known. While some simulation studies are already  
496 being conducted ([Meynard, Leroy et al. 2019](#)), these have typically been done in  
497 the context of optimizing discrimination accuracy, and as such may also be  
498 largely uninformative about estimating habitat suitability as a function of  
499 environmental gradients. There are many common practices and assumptions in  
500 the field that may need to be reevaluated based on their ability to estimate  
501 habitat suitability; choice of algorithm, methods for choosing predictor variables,  
502 choice of study area, rarefaction of data, and optimal model complexity are  
503 obvious candidates.

504         In addition, we argue that practitioners must recognize that favoring  
505 models based strictly on their spatial predictions is simply inappropriate for  
506 many applications. In studies where the goal is to estimate the niche (i.e.,  
507 maximize functional accuracy), users must become comfortable with the idea

508 that a biologically accurate model may produce relatively poor estimates of  
509 species' current spatial distributions. This is not simply a methodological point  
510 brought to light by the current simulation study; it is necessarily true given the  
511 existence of non-target phenomena that themselves have spatial structure (e.g.,  
512 biotic interactions, dispersal). This has been known for years ([Jackson and](#)  
513 [Overpeck 2000](#), [Soberon and Peterson 2005](#), [Anderson 2012](#), [Warren 2012](#),  
514 [Warren 2013](#)), yet has been largely ignored in the continued pursuit of methods  
515 that produce tighter and tighter fits to training or test data in geographic space.

516         Investigators familiar with SDM methods will no doubt wish to critically  
517 examine the methods used here to infer models; there are other algorithms  
518 available, and there are many modeling choices that we did not explore in great  
519 depth. However, these criticisms are largely irrelevant to the primary results of  
520 this study; while it is certainly possible that greater effort in exploring the space  
521 of model choices might improve the accuracy of models, we note that (1)  
522 evaluation metrics on randomly withheld test data for the models generated  
523 here are not unusual for the range seen in the empirical SDM literature (e.g.,  
524 Appendix S5), (2) the overall performance of SDM methods is irrelevant to  
525 whether or not discrimination accuracy is a valid indicator of functional  
526 accuracy, and (3) most SDM users' methodological preferences are currently  
527 chosen based on studies that seek to maximize the very performance metrics  
528 that the current study demonstrates are not useful for estimating functional  
529 accuracy.

530         We acknowledge the possibility that there is some subset of modeling  
531 approaches not addressed here for which discrimination and functional accuracy  
532 are highly correlated. It would be both gratifying and very useful to find such a

533 set of conditions, and that topic deserves to be examined in great depth.  
534 However, even if such a set can be found it does not invalidate the conclusion  
535 presented here; that there is a large range of modeling algorithms and  
536 approaches for which the correlation between discrimination accuracy and  
537 functional accuracy is not strong enough to be useful in model selection for many  
538 purposes. Similarly, we acknowledge that the disconnect between functional  
539 accuracy and discrimination seen here may be affected by sample size, but the  
540 sample sizes used here (75 training, 25 test) are not atypical for the ENM  
541 literature.

542 In summary, we demonstrate that, under a broad range of conditions, the  
543 ability of a model to successfully predict withheld occurrence data within the  
544 training region does not reliably measure its ability to estimate the relationship  
545 between environmental gradients and habitat suitability. Discrimination  
546 accuracy may be a reasonable metric when the goal is to guide further sampling  
547 of occurrences within a species' current range, without regard for whether the  
548 model estimates the true environmental niche or the relative suitability of  
549 habitat well. However, this is not often the goal of empirical model construction  
550 in the SDM literature.

551 As a result, the applied and methodological literature in this field are  
552 largely based on metrics that may be irrelevant to the intended applications of  
553 many models. If the field is to continue to attempt to use SDMs to infer species'  
554 responses to environmental gradients, we must develop methods for model  
555 construction and metrics for model evaluation that are more relevant to the  
556 actual goals of the modeling process. While we find that geographically  
557 structured partitioning of test data does offer some advantages over randomly

558 withheld data, it is clear from this study that even those methods have very  
559 limited ability to identify models that accurately estimate the relative suitability  
560 of habitat.

561 We would like to particularly highlight the implications of our results for  
562 the development of new methods in this field in the coming years. Many  
563 investigators are currently developing methods that incorporate more biological  
564 and statistical realism into the SDM process, including the integration of  
565 physiological and trait data ([Pollock, Kelly et al. 2018](#)) and explicit models of bias  
566 ([Robinson, Ruiz - Gutierrez et al. 2018](#)), dispersal ([Zurell 2017](#)), plasticity ([Bush,  
567 Mokany et al. 2016](#)), and evolutionary history ([Smith, Godsoe et al. 2019](#)). In any  
568 system affected by non-target spatial phenomena, these methods will often  
569 produce poorer estimates of species' geographic distributions precisely because  
570 they provide better estimates of the environmental niche. We hope that the  
571 results presented here will compel the field to evaluate these new methods  
572 based on their ability to infer the biological phenomena of interest, as  
573 demonstrated using simulations or physiological data, rather than simply reject  
574 them due to poor discrimination accuracy on misleading occurrence data.

575 We feel it is necessary to specifically address one interpretation of these  
576 results that we feel is not appropriate: the work presented here is not intended  
577 to suggest that any particular method of SDM construction is inherently better or  
578 worse than others. While the relative performance of different methods is a very  
579 interesting question and one that deserves further exploration within a  
580 simulation framework, this study was not designed to address those questions  
581 and it would be inappropriate to interpret these results as such. We emphasize  
582 that most of the models built from these simulated species were arguably



583 publishable distribution estimates, and were at least somewhat useful as  
584 estimates of the species' niche. Rather, this study is intended to examine the  
585 performance of widely-used methods of model selection, and it is those methods  
586 that are performing poorly. We demonstrate that we can make both good  
587 distribution estimates and good niche estimates using common methods, and in  
588 fact produced many models that are good for both purposes. However, our  
589 results indicate that we have a difficult time distinguishing good models from  
590 bad when our goal is functional accuracy.

591         At minimum, our results suggest that any empirical study using  
592 discrimination accuracy to assess model quality should start with two crucial  
593 steps: (1) use a minimal set of predictor variables for which there is an a priori  
594 reason to expect that they limit the suitability of habitat for the species, and (2)  
595 select algorithms capable of inferring functional responses that are plausible  
596 estimates of the underlying biology (e.g., not using a step function in situations  
597 where suitability is expected to be a continuous function of the predictor  
598 variable). In a sense, these findings are unsurprising; they recapitulate  
599 longstanding best practices in the broader literature regarding statistical  
600 modeling ([Anderson and Burnham 2004](#), [Burnham and Anderson 2004](#), [Gelman  
601 and Hill 2006](#), [Zuur, Ieno et al. 2009](#)). However, here we show that failure to  
602 make these choices appropriately does not necessarily lead to poor predictions;  
603 instead it means that we are largely unable to distinguish good models from bad  
604 using species occurrence data. Under these conditions any preference for a  
605 given model based on discrimination accuracy may be little better than choosing  
606 a model at random.

607

608

| Independent variable | Dependent variable | Simple | Complex | Large BG | Geographic |
|----------------------|--------------------|--------|---------|----------|------------|
| Test AUC             | Spearman (N)       | +,.01  |         | +,.02    | +,.08      |
| Test AUC             | Spearman (C)       |        |         |          | +,.02      |
| Test Max TSS         | Spearman (N)       | +,.01  |         | +,.02    | +,.07      |
| Test Max TSS         | Spearman (C)       |        | -,.01   |          | +,.01      |
| Test Max Kappa       | Spearman (N)       |        | -,.01   | +,.01    | +,.06      |
| Test Max Kappa       | Spearman (C)       | -, .01 | -,.01   | -,.01    | +,.01      |
| Test AUC             | Spearman (F, N)    | +,.10  | +,.11   | +,.11    | +,.12      |
| Test AUC             | Spearman (F, C)    | +,.01  |         | +,.08    | +,.01      |
| Test Max TSS         | Spearman (F, N)    | +,.09  | +,.10   | +,.11    | +,.12      |
| Test Max TSS         | Spearman (F, C)    |        |         |          | +,.01      |
| Test Max Kappa       | Spearman (F, N)    | +,.20  | +,.05   | +,.11    | +,.10      |
| Test Max Kappa       | Spearman (F, C)    |        |         |          | +,.01      |

Table 1. Results of regressions functional accuracy on discrimination accuracy, all algorithms considered together. Significant positive correlations are represented by “+” and green cell color, negative correlations by “-“ and pink cell color. Numbers indicate  $r^2$  values for each regression. Variables accompanied by (F) indicate that they were measured on models projected across 24 future climate scenarios. Variables with (N) and(C) indicated models projected within the species native range or at a continental scale, respectively. Results are presented separately for four model sets: the “simple” set of predictors (2 variables in the true niche, 4 predictors per model,

100km buffer), the “complex” set of predictors (3 variables in the true niche, 19 predictors per model, 100km buffer), the “large background” study region (same simulation settings as “complex” but with a 1000km buffer), and the “geographically structured” model set, for which models were constructed and evaluated using geographically partitioned data (same simulation settings as “complex” but with geographic partitioning of data instead of random holdouts).

| Independent variable | Dependent variable | Simple |    |       |       |       |       | Complex |       |       |       |       |       |       |       |
|----------------------|--------------------|--------|----|-------|-------|-------|-------|---------|-------|-------|-------|-------|-------|-------|-------|
|                      |                    | BC     | DM | GAM   | GLM   | MX    | RF    | BRT     | BC    | DM    | GAM   | GLM   | MX    | RF    | BRT   |
| Test AUC             | Spearman (N)       |        |    |       | +,.15 | +,.06 | +,.05 | +,.05   | -,.05 | -,.08 |       | +,.06 | +,.06 | +,.06 | +,.05 |
| Test AUC             | Spearman (C)       |        |    | +,.08 | +,.07 |       |       |         | -,.10 |       |       |       | +,.05 |       |       |
| Test Max TSS         | Spearman (N)       |        |    |       | +,.14 | +,.04 |       |         | -,.04 | -,.1  |       | +,.04 | +,.04 | +,.04 | +,.05 |
| Test Max TSS         | Spearman (C)       | -,.05  |    | +,.07 | +,.07 |       |       |         | -,.11 |       |       |       | +,.04 |       |       |
| Test Max Kappa       | Spearman (N)       |        |    |       | +,.11 |       |       |         | -,.07 | -,.10 |       |       |       |       |       |
| Test Max Kappa       | Spearman (C)       | -,.06  |    |       | +,.04 |       |       |         | -,.14 |       |       |       |       |       |       |
| Test AUC             | Spearman (F, N)    | +,.06  |    | +,.17 | +,.14 | +,.18 | +,.08 | +,.15   | +,.10 | +,.05 | +,.14 | +,.06 | +,.26 | +,.11 | +,.11 |
| Test AUC             | Spearman (F, C)    |        |    | +,.09 | +,.06 | +,.04 |       |         |       |       |       |       | +,.05 |       |       |
| Test Max TSS         | Spearman (F, N)    | +,.05  |    | +,.14 | +,.14 | +,.15 | +,.05 | +,.12   | +,.09 | +,.05 | +,.14 | +,.05 | +,.23 | +,.08 | +,.09 |
| Test Max TSS         | Spearman (F, C)    |        |    | +,.07 | +,.05 |       |       |         |       |       |       |       | +,.04 |       |       |
| Test Max Kappa       | Spearman (F, N)    |        |    | +,.10 | +,.10 | +,.11 |       | +,.06   | +,.08 | +,.04 | +,.07 | +,.05 | +,.14 |       |       |
| Test Max Kappa       | Spearman (F, C)    |        |    | +,.04 |       |       |       |         |       |       |       |       |       |       |       |

|                |                 | Large Background |    |       |       |       |       | Geographic Partitioning |       |       |       |       |       |       |       |
|----------------|-----------------|------------------|----|-------|-------|-------|-------|-------------------------|-------|-------|-------|-------|-------|-------|-------|
|                |                 | BC               | DM | GAM   | GLM   | MX    | RF    | BRT                     | BC    | DM    | GAM   | GLM   | MX    | RF    | BRT   |
| Test AUC       | Spearman (N)    |                  |    |       | +,.08 | +,.08 | +,.05 | +,.07                   | +,.06 | +,.02 | +,.05 | +,.09 | +,.14 | +,.07 | +,.17 |
| Test AUC       | Spearman (C)    |                  |    |       |       | +,.17 |       |                         |       |       |       |       |       | +,.04 |       |
| Test Max TSS   | Spearman (N)    |                  |    |       | +,.08 | +,.08 | +,.05 | +,.07                   | +,.06 |       | +,.06 | +,.09 | +,.12 | +,.07 | +,.19 |
| Test Max TSS   | Spearman (C)    | -,.04            |    | -,.05 |       | +,.18 |       |                         |       |       |       |       |       |       |       |
| Test Max Kappa | Spearman (N)    |                  |    |       | +,.05 | +,.07 |       | +,.04                   | +,.05 |       |       | +,.09 | +,.09 | +,.06 | +,.13 |
| Test Max Kappa | Spearman (C)    | -,.12            |    | -,.08 |       | +,.10 | +,.07 |                         |       |       |       |       |       |       |       |
| Test AUC       | Spearman (F, N) | +,.06            |    |       | +,.10 | +,.25 | +,.16 | +,.21                   |       |       | +,.10 | +,.11 | +,.16 | +,.19 | +,.21 |
| Test AUC       | Spearman (F, C) |                  |    |       |       | +,.25 |       |                         |       |       |       |       |       |       |       |
| Test Max TSS   | Spearman (F, N) | +,.05            |    |       | +,.09 | +,.26 | +,.18 | +,.23                   |       |       | +,.12 | +,.12 | +,.17 | +,.20 | +,.19 |
| Test Max TSS   | Spearman (F, C) |                  |    |       |       | +,.27 |       |                         |       |       |       |       | +,.04 |       |       |
| Test Max Kappa | Spearman (F, N) | +,.04            |    |       | +,.06 | +,.23 | +,.13 | +,.16                   |       |       | +,.10 | +,.12 | +,.13 | +,.15 | +,.15 |
| Test Max Kappa | Spearman (F, C) |                  |    |       |       | +,.17 | +,.06 |                         |       |       |       |       |       |       |       |

Table 2. Relationship between discrimination accuracy and functional accuracy, methods considered separately. Significant positive correlations are represented by “+” and green cell color, negative correlations by “-“ and pink cell color. Numbers indicate  $r^2$  values for each regression. Variables accompanied by (F) indicate that they were measured on models projected across 24 future climate scenarios. Variables with (N) and(C) indicated models projected within the species native range or at a continental scale, respectively. Results are presented separately for four model sets: the “simple” set of predictors (2 variables in the true niche, 4 predictors per model, 100km buffer), the “complex” set of predictors (3 variables in the true niche, 19 predictors per model, 100km buffer), the “large background” study region (same simulation settings as “complex” but with a 1000km buffer), and the “geographically structured” model set, for which models were constructed and evaluated using geographically partitioned data (same simulations settings as “complex” but with geographic partitioning of data instead of random holdouts).

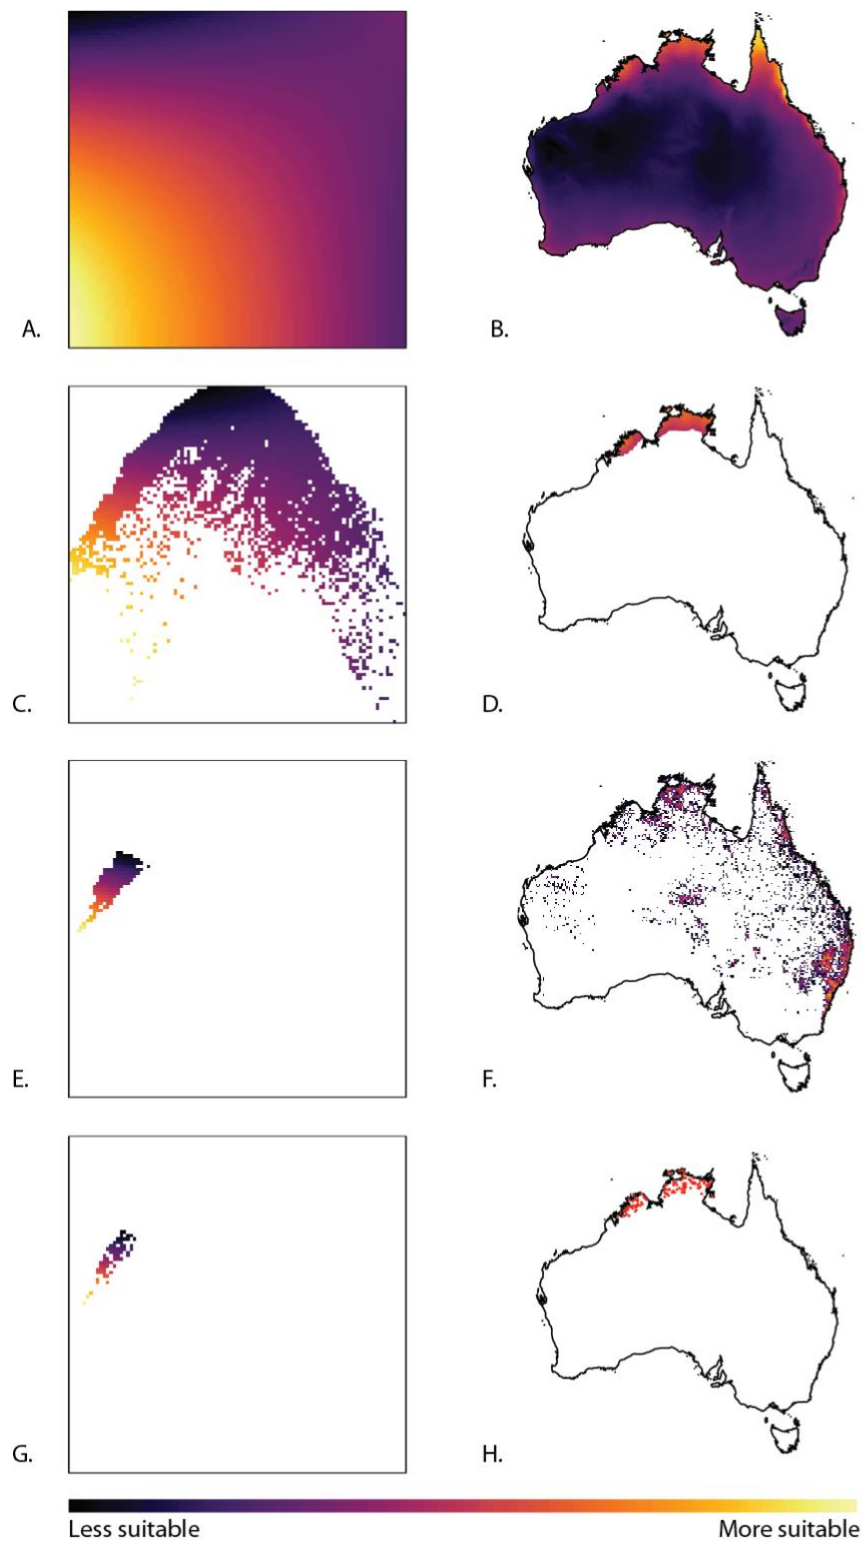

Figure 1. Phenomena affecting species distributions and inference of suitability of habitat. Panel A depicts the niche of a simulated species in the first two principal component axes of the 19 Bioclim variables for Australia. Panel B represents the distribution of suitable habitat for the simulated species. The available habitat present across the continent of Australia only represents a subset of the possible niche space (C). The species' current range only encompasses a subset of the suitable habitat (D), which further limits the potential distribution of data in environment space (E). Spatial sampling bias (F, see methods) contributes further bias to the representation of the species both in environment space (G) and geographic space (H). While the geographic distribution of the data (H, red points) may resemble the current range of the species (D), the distribution of that data in environment space (G) is a poor representation of the species' true niche (A). As a result, it may be relatively easy to achieve accurate predictions on randomly withheld occurrence data while still producing a poor estimate of the underlying biology and suitability of habitat.



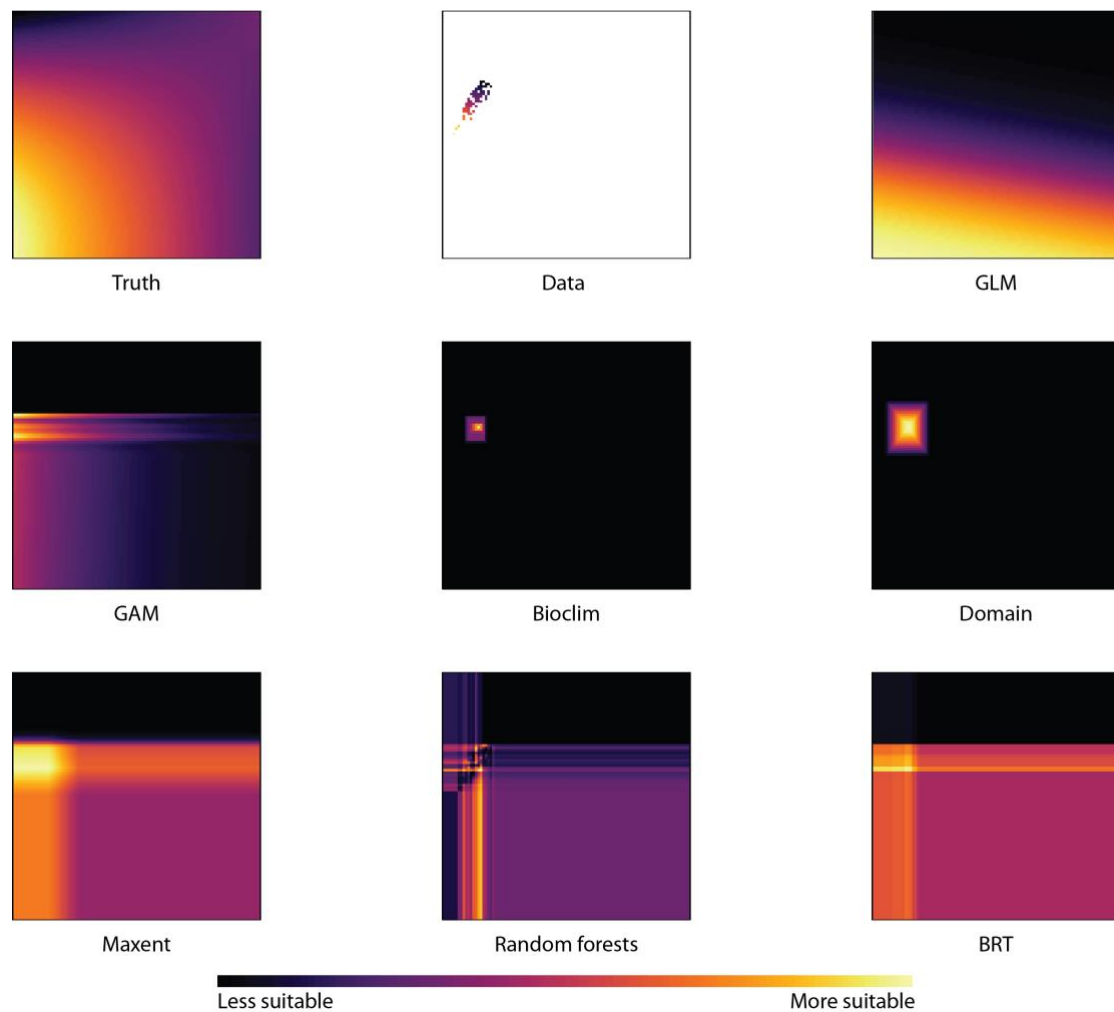

Figure 2. Projection of modeling algorithms in environment space. Using 100 occurrence points for the simulated species in figure 1, we built models using the seven algorithms employed in this study and projected them into the same two dimensional principal component space. The lowest AUC score on 20 randomly withheld data points belonged to random forests (AUC = 0.55), while the highest came from domain (AUC = 0.73). The top left and top center panels show the true niche of the simulated species and the environmental distribution of the data, respectively.

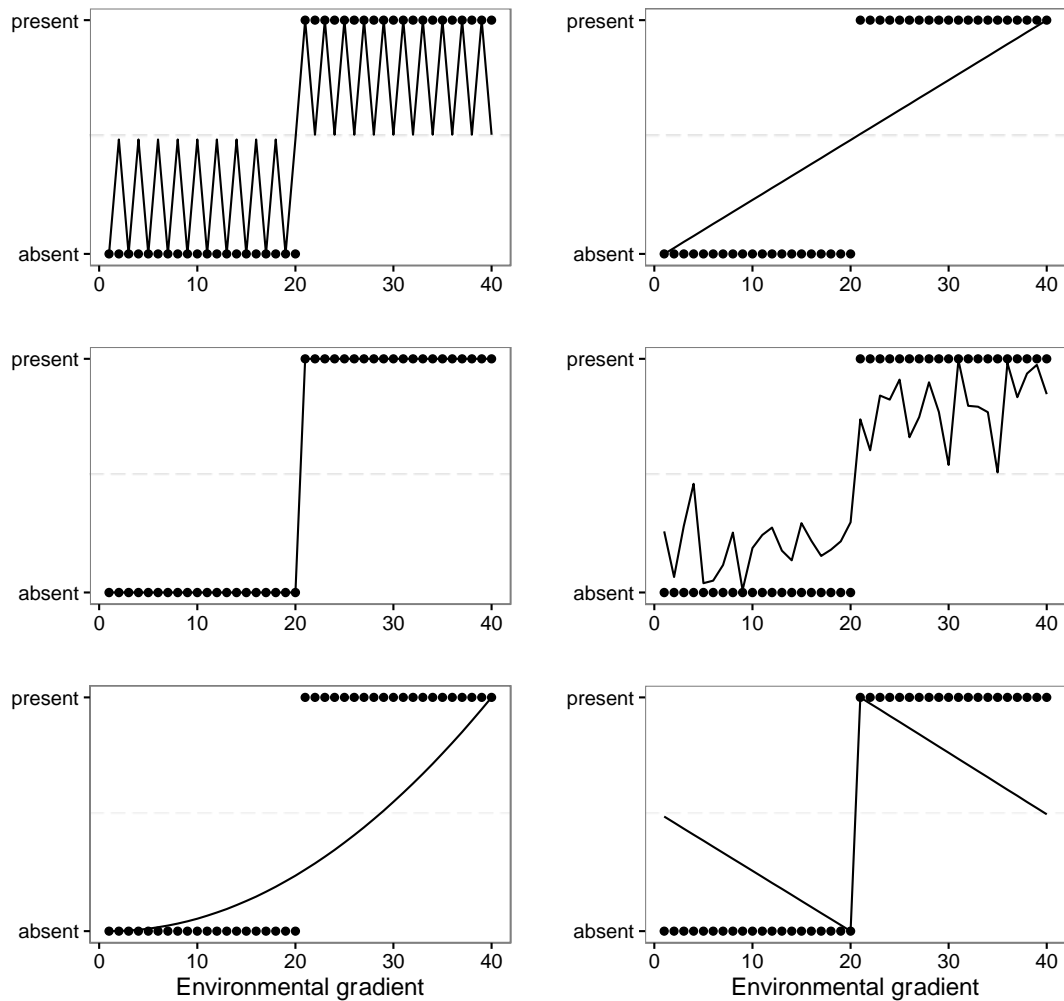

Figure 3. Low information content of discrimination accuracy for inferring functional accuracy. In the above plots, we have simulated 20 absence and 20 presence points along a hypothetical environmental gradient. The six panels represent six hypothetical functions that might be inferred using this data. Each function assigns a higher suitability score (y axis) to all of the presence points than it does to any of the background or absence points. As a result, each function has perfect discrimination accuracy. All six functions are therefore indistinguishable from each other based on discrimination metrics (AUC, TSS,

Kappa), while making very different estimates of the functional relationship of habitat suitability to the environmental predictor variable.

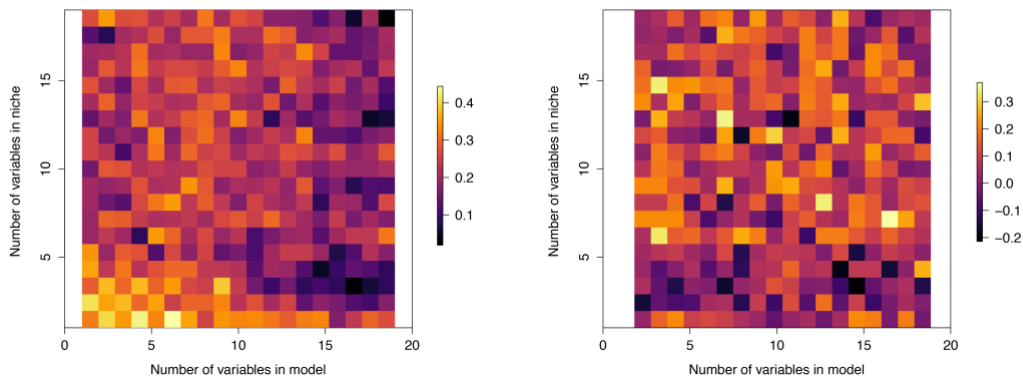

Figure 4. Relationship between number of variables in simulated niche, number of variables in model, and the ability of discrimination to infer functional accuracy for GLM (left) and Maxent (right). Each grid cell represents the output of 300 simulations. The color of each grid cell represents the Spearman rank correlation between test AUC values and functional accuracy.

Supplementary materials:

Appendix S1. Frequency of use of model fit metrics (columns) and partitioning scheme for test data (rows) from a survey of 94 recent applied SDM studies.

Appendix S2. Literature review for metrics of model fit.

Appendix S3. Relationship between evaluation metrics and simulation settings, all algorithms considered together.

Appendix S4. Relationship between discrimination accuracy and functional accuracy using Pearson product moment correlations.

Appendix S5. Discrimination and functional accuracy performance for each simulation experiment.

Data Availability:

Sample code is available on github here:

<https://github.com/danlwarren/sim-code-Warren-et-al-2019>

## **Acknowledgements**

This work would not have been possible without the financial contributions of the Macquarie University Department of Biology and a DECRA award from the Australian Research Council.

- Acevedo, P., A. Jimenez-Valverde, J. M. Lobo and R. Real (2012). "Delimiting the geographical background in species distribution modelling." Journal of Biogeography **39**(8): 1383-1390.
- Allen, J. L. and J. C. Lendemer (2016). "Climate change impacts on endemic, high-elevation lichens in a biodiversity hotspot." Biodiversity and Conservation **25**(3): 555-568.
- Allouche, O., A. Tsoar and R. Kadmon (2006). "Assessing the accuracy of species distribution models: prevalence, kappa and the true skill statistic (TSS)." Journal of Applied Ecology **43**(6): 1223-1232.
- Anderson, D. and K. Burnham (2004). "Model selection and multi-model inference." Second. NY: Springer-Verlag: 63.
- Anderson, R. P. (2012). "Harnessing the world's biodiversity data: promise and peril in ecological niche modeling of species distributions." Ann N Y Acad Sci **1260**: 66-80.
- Bahn, V. and B. J. McGill (2007). "Can niche-based distribution models outperform spatial interpolation?" Global Ecology and Biogeography **16**(6): 733-742.
- Bahn, V. and B. J. McGill (2013). "Testing the predictive performance of distribution models." Oikos **122**(3): 321-331.
- Boria, R. A., L. E. Olson, S. M. Goodman and R. P. Anderson (2014). "Spatial filtering to reduce sampling bias can improve the performance of ecological niche models." Ecological Modelling **275**: 73-77.
- Burnham, K. P. and D. R. Anderson (2004). "Multimodel inference: understanding AIC and BIC in model selection." Sociological methods & research **33**(2): 261-304.

Bush, A., K. Mokany, R. Catullo, A. Hoffmann, V. Kellermann, C. Sgrò, S. McEvey and S. Ferrier (2016). "Incorporating evolutionary adaptation in species distribution modelling reduces projected vulnerability to climate change." Ecology letters **19**(12): 1468-1478.

Carrascal, L. M., P. Aragon, D. Palomino and J. M. Lobo (2015). "Predicting regional densities from bird occurrence data: validation and effects of species traits in a Macaronesian Island." Diversity and Distributions **21**(11): 1284-1294.

Chamberlain, S., C. Boettiger, K. Ram, V. Barve and D. Mcglinn (2013). rgbif: Interface to the Global Biodiversity Information Facility API. R package version 0.4.0. <http://cran.r-project.org/package=rgbif>.

Cohen, J. (1960). "A coefficient of agreement for nominal scales." Educational and Psychological Measurement **20**(1): 37-46.

Cook, W. C. (1925). "The distribution of the alfalfa weevil (*Phytonomus posticus* Gyll.). A study in physical ecology." Journal of Agricultural Research **30**: 479-491.

Coro, G., P. Pagano and A. Ellenbroek (2013). "Combining simulated expert knowledge with Neural Networks to produce Ecological Niche Models for *Latimeria chalumnae*." Ecological Modelling **268**: 55-63.

Domisch, S., M. Kuemmerlen, S. C. Jahnig and P. Haase (2013). "Choice of study area and predictors affect habitat suitability projections, but not the performance of species distribution models of stream biota." Ecological Modelling **257**: 1-10.

Elith, J. and C. H. Graham (2009). "Do they? How do they? WHY do they differ? On finding reasons for differing performances of species distribution models." Ecography **32**(1): 66-77.

Elith, J., C. H. Graham, R. P. Anderson, M. Dudik, S. Ferrier, A. Guisan, R. J. Hijmans, F. Huettmann, J. R. Leathwick, A. Lehmann, J. Li, L. G. Lohmann, B. A. Loiselle, G.



- Manion, C. Moritz, M. Nakamura, Y. Nakazawa, J. M. Overton, A. T. Peterson, S. J. Phillips, K. Richardson, R. Scachetti-Pereira, R. E. Schapire, J. Soberon, S. Williams, M. S. Wisz and N. E. Zimmermann (2006). "Novel methods improve prediction of species' distributions from occurrence data." Ecography **29**(2): 129-151.
- Fielding, A. H. and J. F. Bell (1997). "A review of methods for the assessment of prediction errors in conservation presence/absence models." Environmental Conservation **24**(1): 38-49.
- Fourcade, Y., A. G. Besnard and J. Secondi (2018). "Paintings predict the distribution of species, or the challenge of selecting environmental predictors and evaluation statistics." Global Ecology and Biogeography **27**(2): 245-256.
- Garcia-Callejas, D. and M. B. Araujo (2016). "The effects of model and data complexity on predictions from species distributions models." Ecological Modelling **326**: 4-12.
- GBIF.org (27th September 2015) GBIF Occurrence Download  
<http://doi.org/10.15468/dl.gsmfd3>
- Gelman, A. and J. Hill (2006). Data analysis using regression and multilevel/hierarchical models, Cambridge university press.
- Gomes, V. H., S. D. IJff, N. Raes, I. L. Amaral, R. P. Salomão, L. de Souza Coelho, F. D. de Almeida Matos, C. V. Castilho, D. de Andrade Lima Filho and D. C. López (2018). "Species Distribution Modelling: Contrasting presence-only models with plot abundance data." Scientific reports **8**(1): 1003.
- Guisan, A., C. H. Graham, J. Elith, F. Huettmann and N. S. Distri (2007). "Sensitivity of predictive species distribution models to change in grain size." Diversity and Distributions **13**(3): 332-340.

Guisan, A., W. Thuiller and N. E. Zimmermann (2017). Habitat suitability and distribution models: with applications in R, Cambridge University Press.

Gutierrez-Tapia, P. and R. E. Palma (2016). "Integrating phylogeography and species distribution models: cryptic distributional responses to past climate change in an endemic rodent from the central Chile hotspot." Diversity and Distributions **22**(6): 638-650.

Hijmans, R. J. (2012). "Cross-validation of species distribution models: removing spatial sorting bias and calibration with a null model." Ecology **93**(3): 679-688.

Hijmans, R. J., S. E. Cameron, J. L. Parra, P. G. Jones and A. Jarvis (2005). "Very high resolution interpolated climate surfaces for global land areas." International Journal of Climatology **25**(15): 1965-1978.

Hijmans, R. J., S. Phillips, J. Leathwick and J. Elith (2012). dismo: Species distribution modeling. R package version 0.7-23. <http://cran.r-project.org/web/packages/dismo/index.html>.

Huang, J. and E. A. Frimpong (2016). "Limited transferability of stream-fish distribution models among river catchments: reasons and implications." Freshwater Biology **61**(5): 729-744.

Jackson, S. T. and J. T. Overpeck (2000). "Responses of plant populations and communities to environmental changes of the late Quaternary." Paleobiology **26**(4): 194-220.

Jimenez-Valverde, A., P. Acevedo, A. M. Barbosa, J. M. Lobo and R. Real (2013). "Discrimination capacity in species distribution models depends on the representativeness of the environmental domain." Global Ecology and Biogeography **22**(4): 508-516.

Kearney, M. (2006). "Habitat, environment and niche: what are we modelling?"

Oikos **115**(1): 186-191.

Keith, D. A., M. Mahony, H. Hines, J. Elith, T. J. Regan, J. B. Baumgartner, D. Hunter,

G. W. Heard, N. J. Mitchell, K. M. Parris, T. Penman, B. Scheele, C. C. Simpson, R.

Tingley, C. R. Tracy, M. West and H. R. Akcakaya (2014). "Detecting Extinction

Risk from Climate Change by IUCN Red List Criteria." Conservation Biology

**28**(3): 810-819.

Kriticos, D. J., B. L. Webber, A. Leriche, N. Ota, I. Macadam, J. Bathols and J. K. Scott

(2012). "CliMond: global high-resolution historical and future scenario climate

surfaces for bioclimatic modelling." Methods in Ecology and Evolution **3**(1): 53-

64.

Kuebler, D., P. Hildebrandt, S. Guenter, B. Stimm, M. Weber, R. Mosandl, J. Munoz,

O. Cabrera, N. Aguirre, J. Zeilinger and B. Silva (2016). "Assessing the importance

of topographic variables for the spatial distribution of tree species in a tropical

mountain forest." Erdkunde **70**(1): 19-47.

Leroy, B., C. N. Meynard, C. Bellard and F. Courchamp (2015). "virtualspecies, an

R package to generate virtual species distributions." Ecography **39**(6): 599–607.

Lezama Ochoa, N., H. Murua, G. Chust, E. Van Loon, J. Ruiz, M. Hall, P. Chavance, A.

Delgado de Molina and E. Villarino (2016). "Present and future potential habitat

distribution of *Carcharhinus falciformis* and *Canthidermis maculata* by-catch

species in the tropical tuna purse-seine fishery under climate change." Frontiers

in Marine Science **3**.

Lobo, J. M., A. Jimenez-Valverde and R. Real (2008). "AUC: a misleading measure

of the performance of predictive distribution models." Global Ecology and

Biogeography **17**(2): 145-151.

Lopatin, J., K. Dolos, H. J. Hernandez, M. Galleguillos and F. E. Fassnacht (2016).

"Comparing Generalized Linear Models and random forest to model vascular plant species richness using LiDAR data in a natural forest in central Chile."

Remote Sensing of Environment **173**: 200-210.

McFadden, D. (1974). Conditional logit analysis of qualitative choice behavior.

Frontiers in Econometrics. P. Zarembka, Academic Press: 105-142.

Meynard, C. N. and D. M. Kaplan (2013). "Using virtual species to study species distributions and model performance." Journal of Biogeography **40**(1): 1-8.

Meynard, C. N., B. Leroy and D. M. Kaplan (2019). "Testing methods in species distribution modelling using virtual species: what have we learnt and what are we missing?" Ecography.

Moreno-Amat, E., R. G. Mateo, D. Nieto-Lugilde, N. Morueta-Holme, J. C. Svenning and I. Garcia-Amorena (2015). "Impact of model complexity on cross-temporal transferability in Maxent species distribution models: An assessment using paleobotanical data." Ecological Modelling **312**: 308-317.

Murphy, A. H. and R. L. Winkler (1992). "Diagnostic verification of probability forecasts." International Journal of Forecasting **7**(4): 435-455.

Muscarella, R., P. J. Galante, M. Soley-Guardia, R. A. Boria, J. M. Kass, M. Uriarte and R. P. Anderson (2014). "ENMeval: An R package for conducting spatially independent evaluations and estimating optimal model complexity for Maxent ecological niche models." Methods in Ecology and Evolution **5**(11): 1198-1205.

Nix, H. A. (1986). Biogeographic Analysis of Australian Elapid Snakes. Atlas of Elapid Snakes of Australia. R. Longmore. Canberra, Australian Government Publishing Service: 4-15.

Peterson, A. T., J. Soberón, R. G. Pearson, R. P. Anderson, E. Martínez-Meyer, M.

Nakamura and M. B. Araújo (2011). Ecological niches and geographic distributions (MPB-49), Princeton University Press.

Phillips, S. J., R. P. Anderson and R. E. Schapire (2006). "Maximum entropy modeling of species geographic distributions." Ecological Modelling **190**(3-4): 231-259.

Phillips, S. J., M. Dudik, J. Elith, C. H. Graham, A. Lehmann, J. Leathwick and S. Ferrier (2009). "Sample selection bias and presence-only distribution models: implications for background and pseudo-absence data." Ecological Applications **19**(1): 181-197.

Pollock, L. J., L. T. Kelly, F. M. Thomas, P. Soe, W. K. Morris, M. White and P. A. Vesk (2018). "Combining functional traits, the environment and multiple surveys to understand semi - arid tree distributions." Journal of Vegetation Science **29**(6): 967-977.

Radosavljevic, A. and R. P. Anderson (2014). "Making better MAXENT models of species distributions: complexity, overfitting and evaluation." Journal of Biogeography **41**(4): 629-643.

Raes, N. and H. ter Steege (2007). "A null-model for significance testing of presence-only species distribution models." Ecography **30**(5): 727-736.

Raghavan, R. K., D. G. Goodin, G. A. Hanzlicek, G. Zolnerowich, M. W. Dryden, G. A.

Anderson and R. R. Ganta (2016). "Maximum Entropy-Based Ecological Niche Model and Bio-Climatic Determinants of Lone Star Tick (*Amblyomma americanum*) Niche." Vector-Borne and Zoonotic Diseases **16**(3): 205-211.

Reineking, B. and B. Schröder (2006). "Constrain to perform: regularization of habitat models." Ecological Modelling **193**(3-4): 675-690.

- Robinson, O. J., V. Ruiz - Gutierrez and D. Fink (2018). "Correcting for bias in distribution modelling for rare species using citizen science data." Diversity and Distributions **24**(4): 460-472.
- Rovzar, C., T. W. Gillespie and K. Kawelo (2016). "Landscape to site variations in species distribution models for endangered plants." Forest Ecology and Management **369**: 20-28.
- Smith, A. B., W. Godsoe, F. Rodriguez-Sanchez, H. H. Wang and D. Warren (2019). "Niche Estimation Above and Below the Species Level." Trends Ecol Evol **34**(3): 260-273.
- Soberon, J. and A. T. Peterson (2005). "Interpretation of Models of Fundamental Ecological Niches and Species' Distributional Areas." 2005 **2**.
- Soley-Guardia, M., E. E. Gutierrez, D. M. Thomas, J. Ochoa-G, M. Aguilera and R. P. Anderson (2016). "Are we overestimating the niche? Removing marginal localities helps ecological niche models detect environmental barriers." Ecology and Evolution **6**(5): 1267-1279.
- Sutherst, R. W. (2014). "Pest species distribution modelling: origins and lessons from history." Biological Invasions **16**(2): 239-256.
- Thuiller, W., B. Lafourcade, R. Engler and M. B. Araújo (2009). "BIOMOD – a platform for ensemble forecasting of species distributions." Ecography **32**(3): 369-373.
- Torres, L. G., P. J. H. Sutton, D. R. Thompson, K. Delord, H. Weimerskirch, P. M. Sagar, E. Sommer, B. J. Dille, P. G. Ryan and R. A. Phillips (2015). "Poor Transferability of Species Distribution Models for a Pelagic Predator, the Grey Petrel, Indicates Contrasting Habitat Preferences across Ocean Basins." Plos One **10**(3).

van Proosdij, A. S., M. S. Sosef, J. J. Wieringa and N. Raes (2016). "Minimum required number of specimen records to develop accurate species distribution models." Ecography **39**(6): 542-552.

VanDerWal, J., L. P. Shoo, C. N. Johnson and S. E. Williams (2009). "Abundance and the Environmental Niche: Environmental Suitability Estimated from Niche Models Predicts the Upper Limit of Local Abundance." American Naturalist **174**(2): 282-291.

Varela, S., R. P. Anderson, R. Garcia-Valdes and F. Fernandez-Gonzalez (2014). "Environmental filters reduce the effects of sampling bias and improve predictions of ecological niche models." Ecography **37**(11): 1084-1091.

Veloz, S. D. (2009). "Spatially autocorrelated sampling falsely inflates measures of accuracy for presence-only niche models." Journal of Biogeography **36**(12): 2290-2299.

Warren, D. L. (2012). "In defense of 'niche modeling'." Trends in Ecology & Evolution **27**(9): 497-500.

Warren, D. L. (2013). "'Niche modeling': that uncomfortable sensation means it's working. A reply to McNerny and Etienne." Trends in Ecology & Evolution **28**(4): 193-194.

Warren, D. L., M. Cardillo, D. F. Rosauer and D. I. Bolnick (2014). "Mistaking geography for biology: inferring processes from species distributions." Trends in Ecology & Evolution **29**(10): 572-580.

Warren, D. L., A. N. Wright, S. N. Seifert and H. B. Shaffer (2014). "Incorporating model complexity and spatial sampling bias into ecological niche models of climate change risks faced by 90 California vertebrate species of concern." Diversity and Distributions **20**(3): 334-343.

Wisz, M. S., R. J. Hijmans, J. Li, A. T. Peterson, C. H. Graham, A. Guisan and N. P. S.

D. W. Group (2008). "Effects of sample size on the performance of species

distribution models." Diversity and Distributions **14**(5): 763-773.

Zhu, G.-P., D. Rédei, P. Kment and W.-J. Bu (2014). "Effect of geographic

background and equilibrium state on niche model transferability: predicting

areas of invasion of *Leptoglossus occidentalis*." Biological Invasions **16**(5): 1069-

1081.

Zurell, D. (2017). "Integrating demography, dispersal and interspecific

interactions into bird distribution models." Journal of Avian Biology **48**(12):

1505-1516.

Zuur, A., E. N. Ieno, N. Walker, A. A. Saveliev and G. M. Smith (2009). Mixed effects

models and extensions in ecology with R, Springer Science & Business Media.
